# Supplementary material for: A new Zn(ii) MOF assembled from metal–organic cubes (MOCs) as a highly efficient adsorbent for cationic dyes
Source: Royal Society of Chemistry journal article supplement (doi:10.1039/d0ce01577f), 2021-01-01
Supplement: d0ce01577f1.pdf [file d0ce01577f1.pdf]

## A new Zn(II) MOF assembled from metal–organic cubes (MOCs) as an ultimate adsorbent for cationic dyes

Armeen Siddique<sup>a</sup>, Mantasha I.<sup>b</sup>, Ram Niwas Singh<sup>a\*</sup>, Poonam Rawat<sup>a</sup>, M. Shahid<sup>b\*</sup>, Shweta Trivedi<sup>a</sup>, Anshu Gautam<sup>a</sup>, Mohd Zeeshan<sup>b</sup>

<sup>a</sup>Department of Chemistry, University of Lucknow, India

<sup>b</sup>Functional Inorganic Materials Lab (FIML), Department of Chemistry, Aligarh Muslim University, Aligarh-202002, India.

<sup>c</sup>†Corresponding authors, E-mail: [rnsvk.chemistry@gmail.com](mailto:rnsvk.chemistry@gmail.com), [shahid81chem@gmail.com](mailto:shahid81chem@gmail.com)

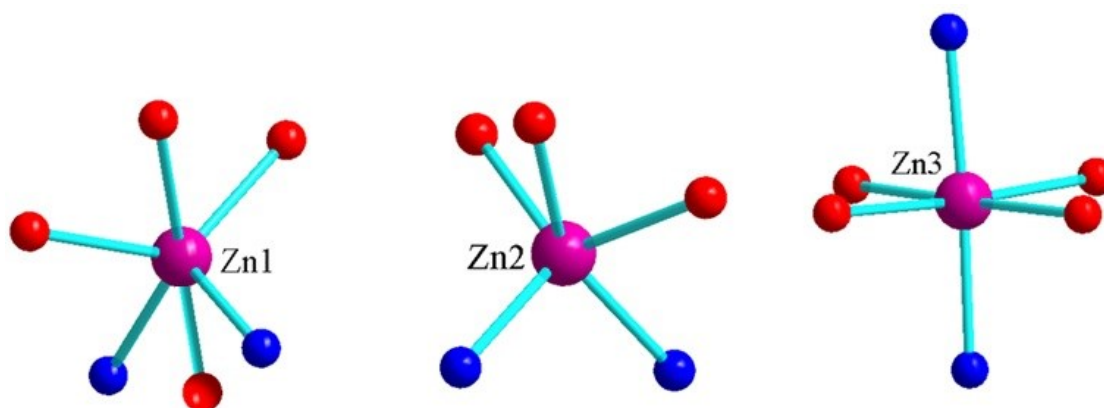

Fig. S1 Various coordination modes of Zn metal atom present in **1**.

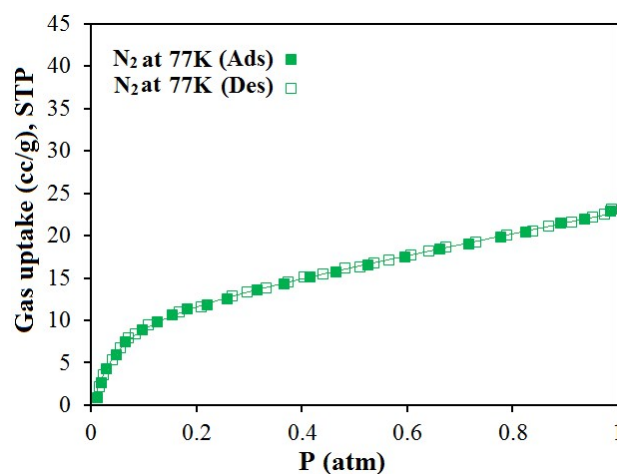

Fig. S2 Adsorption isotherms of **1** at 77 K up to 1 bar pressure for N<sub>2</sub>

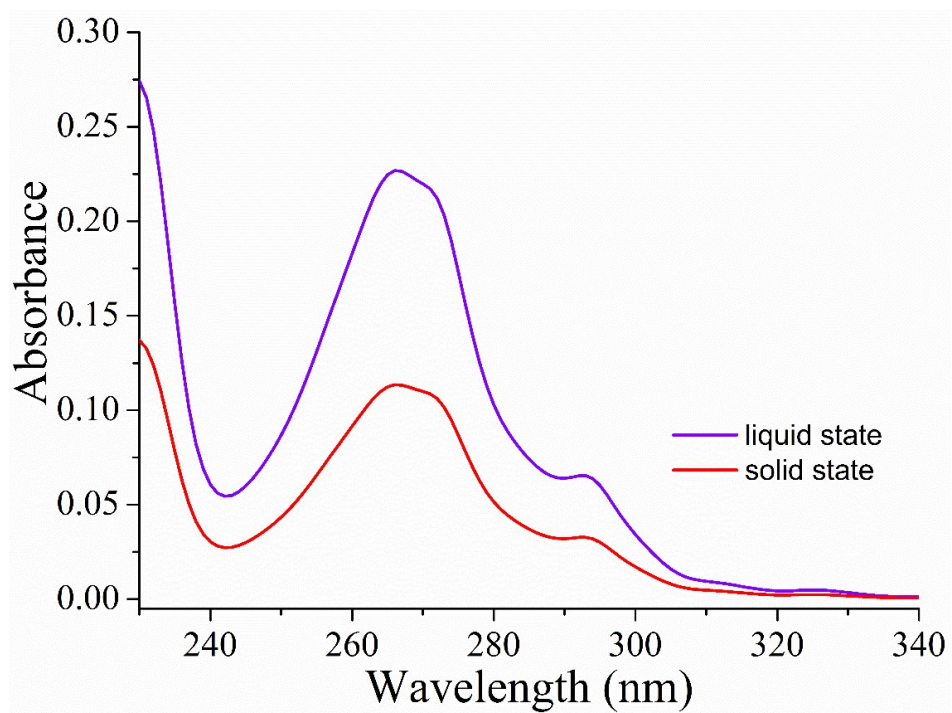

Fig. S3: UV-vis spectra of **1** in liquid and solid state.

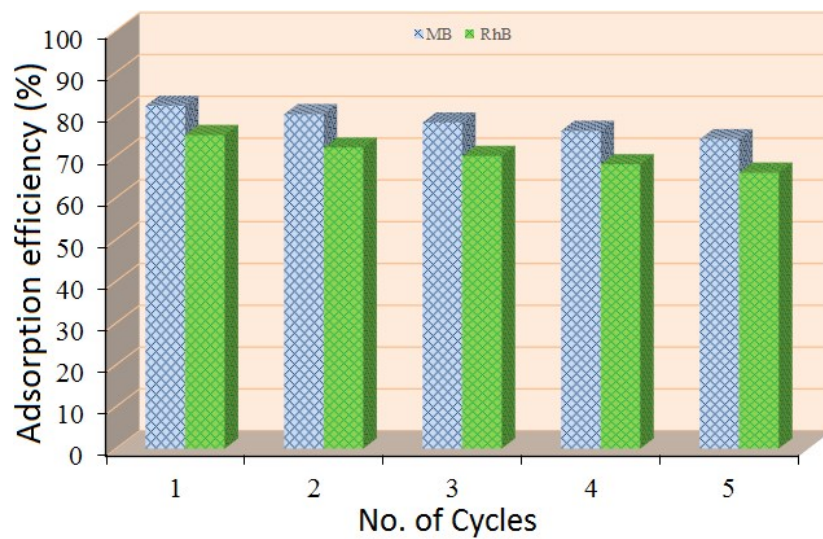

Fig. S4 Recyclability plot of **1**.

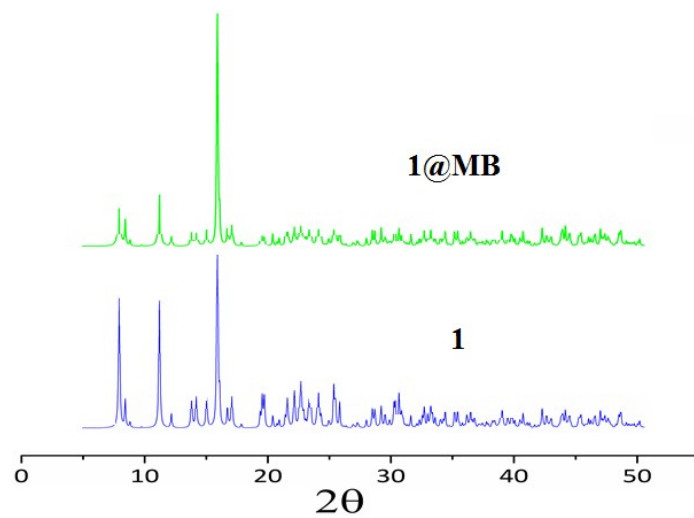

Fig. S5 PXRD patterns of **1** before and after adsorption of MB.

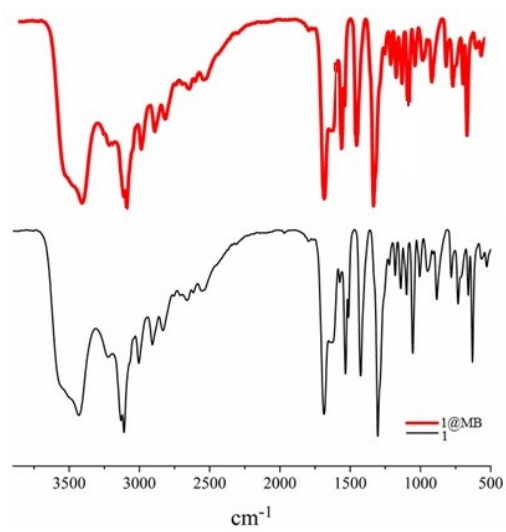

Fig. S6 FTIR spectra of **1** before and after adsorption of MB.

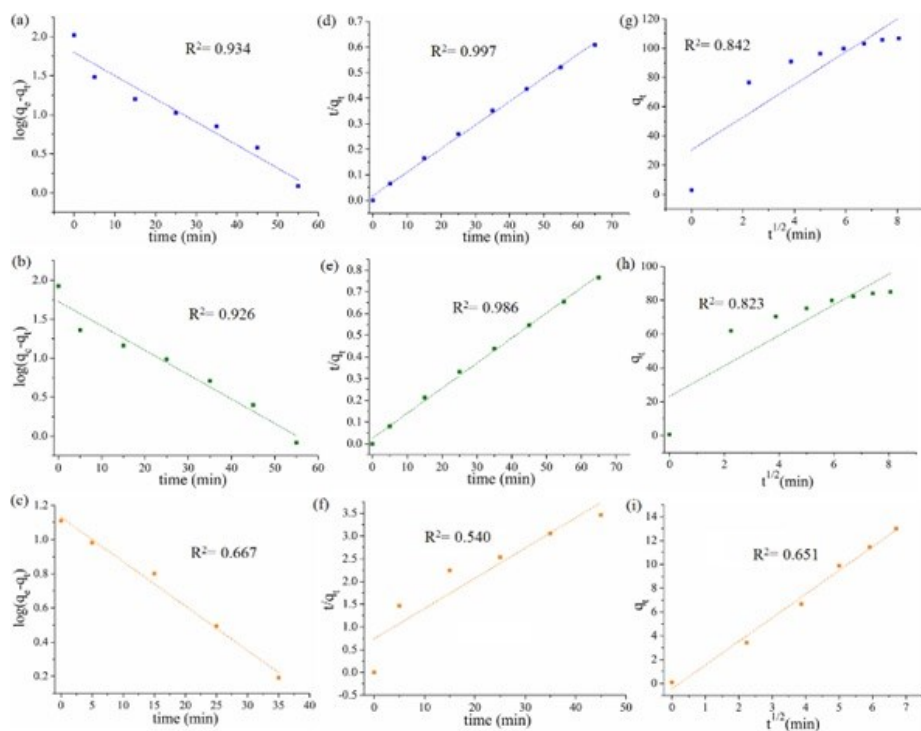

**Fig. S7** The adsorption kinetics of dye pollutants MB, RB and MO by **1** are represented by (a), (b) and (c), respectively as pseudo-first order kinetics and by (d), (e) and (f), respectively as pseudo-second order kinetics and by (g), (h) and (i), respectively, as intraparticle diffusion.

| Table S1: Bond length and bond angle for <b>1</b> . |          |                         |           |
|-----------------------------------------------------|----------|-------------------------|-----------|
| <b>Cu-btc-1</b>                                     |          |                         |           |
| <b>Bond Angle(°)</b>                                |          | <b>Bond distance(Å)</b> |           |
| O3 Zn1 O2                                           | 130.5(5) | Zn1 O2                  | 2.238(12) |
| N3 Zn1 O2                                           | 113.5(4) | Zn1 O3                  | 2.339(11) |
| N3 Zn1 O3                                           | 92.8(4)  | Zn1 N3                  | 2.258(12) |
| N5 Zn1 O2                                           | 113.7(4) | Zn1 N5                  | 2.274(12) |
| N5 Zn1 O3                                           | 95.2(4)  | Zn2 O5                  | 2.198(12) |
| N5 Zn1 N3                                           | 107.6(5) | Zn2 O8                  | 2.343(10) |
| O8 Zn2 O5                                           | 122.7(5) | Zn2 N2                  | 2.320(13) |
| N2 Zn2 O5                                           | 119.9(5) | Zn2 N4                  | 2.236(12) |
| N2 Zn2 O8                                           | 99.1(4)  | Zn3 O9                  | 2.312(12) |
| N4 Zn2 O5                                           | 111.6(4) | Zn3 O10                 | 2.293(10) |
| N4 Zn2 O8                                           | 94.2(4)  | Zn3 O11                 | 2.309(14) |
| N4 Zn2 N2                                           | 105.5(4) | Zn3 O13                 | 2.358(12) |
| O10 Zn3 O9                                          | 90.8(6)  | Zn3 N1                  | 2.252(11) |
| O11 Zn3 O9                                          | 92.3(6)  | Zn3 N6                  | 2.249(13) |
| O11 Zn3 O10                                         | 176.9(4) |                         |           |
| O13 Zn3 O9                                          | 176.3(4) |                         |           |
| O13 Zn3 O10                                         | 88.7(5)  |                         |           |
| O13 Zn3 O11                                         | 88.2(5)  |                         |           |
| N1 Zn3 O9                                           | 85.1(4)  |                         |           |
| N1 Zn3 O10                                          | 87.6(4)  |                         |           |
| N1 Zn3 O11                                          | 92.1(4)  |                         |           |
| N1 Zn3 O13                                          | 91.2(4)  |                         |           |
| N6 Zn3 O9                                           | 92.8(4)  |                         |           |
| N6 Zn3 O10                                          | 90.6(4)  |                         |           |
| N6 Zn3 O11                                          | 89.9(4)  |                         |           |
| N6 Zn3 O13                                          | 90.9(4)  |                         |           |
| N6 Zn3 N1                                           | 177.2(4) |                         |           |
